# Supplementary material for: Down-regulation of cyclin-dependent kinase 5 attenuates p53-dependent apoptosis of hippocampal CA1 pyramidal neurons following transient cerebral ischemia
Source: PubMed Central journal article supplement (PMC6737192; doi:10.1038/s41598-019-49623-x), 2019-09-10

Down-regulation of cyclin-dependent kinase 5 attenuates p53-dependent apoptosis of hippocampal CA1 pyramidal neurons following transient cerebral ischemia

Bich Na Shin<sup>1,#</sup>, Dae Won Kim<sup>2,#</sup>, In Hye Kim<sup>3</sup>, Joon Ha Park<sup>4</sup>, Ji Hyeon Ahn<sup>4</sup>, Il Jun Kang<sup>5</sup>, Yun Lyul Lee<sup>6</sup>, Choong-Hyun Lee<sup>7</sup>, In Koo Hwang<sup>8</sup>, Young-Myeong Kim<sup>9</sup>, Sungwoo Ryoo<sup>10</sup>, Tae-Kyeong Lee<sup>11</sup>, Moo-Ho Won<sup>11,\*</sup>, Jae-Chul Lee<sup>11,\*</sup>

<sup>1</sup>*Danchunok Company, Chuncheon, Gangwon, 24210 Republic of Korea*

<sup>2</sup>*Department of Biochemistry and Molecular Biology, and Research Institute of Oral Sciences, College of Dentistry, Kangnung-Wonju National University, Gangneung, Gangwon, 25457 Republic of Korea*

<sup>3</sup>*Famenity Biomedical Research Center, Famenity, Inc., Gwacheon, Gyeonggi, 13837 Republic of South Korea*

<sup>4</sup>*Department of Biomedical Science and Research Institute of Bioscience and Biotechnology, Hallym University, Chuncheon, Gangwon, 24252 Republic of Korea*

<sup>5</sup>*Department of Food Science and Nutrition, Hallym University, Chuncheon, Gangwon, 24252 Republic of Korea*

<sup>6</sup>*Department of Physiology, and Institute of Neurodegeneration and Neuroregeneration, College of Medicine, Hallym University, Chuncheon, Gangwon, 24252 Republic of Korea*

<sup>7</sup>*Department of Pharmacy, College of Pharmacy, Dankook University, Cheonan, Chungcheongnam, 31116 Republic of Korea*

<sup>8</sup>*Department of Anatomy and Cell Biology, College of Veterinary Medicine, and Research Institute for Veterinary Science, Seoul National University, Seoul, 08826 Republic of Korea*

<sup>9</sup>*Department of Molecular and Cellular Biochemistry, School of Medicine, Kangwon National University, Chuncheon, Gangwon, 24341 Republic of Korea*

<sup>10</sup>*Department of Biological Sciences, College of Natural Sciences, Kangwon National University, Chuncheon, Kangwon, 24341 Republic of Korea*

<sup>11</sup>*Department of Neurobiology, School of Medicine, Kangwon National University, Chuncheon, Gangwon, 24341 Republic of Korea*

Figure 2A. Supplemental data

The uncut images of blot in Figure 2A is shown

Total Cdk5

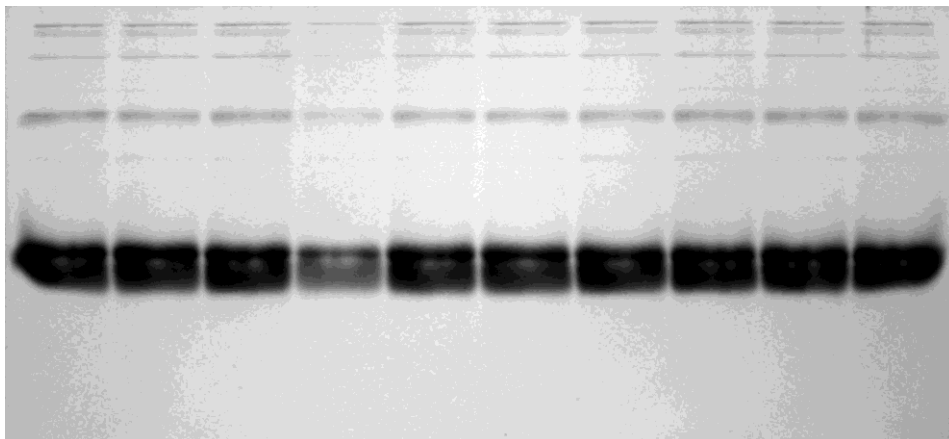

Cytosol Cdk5

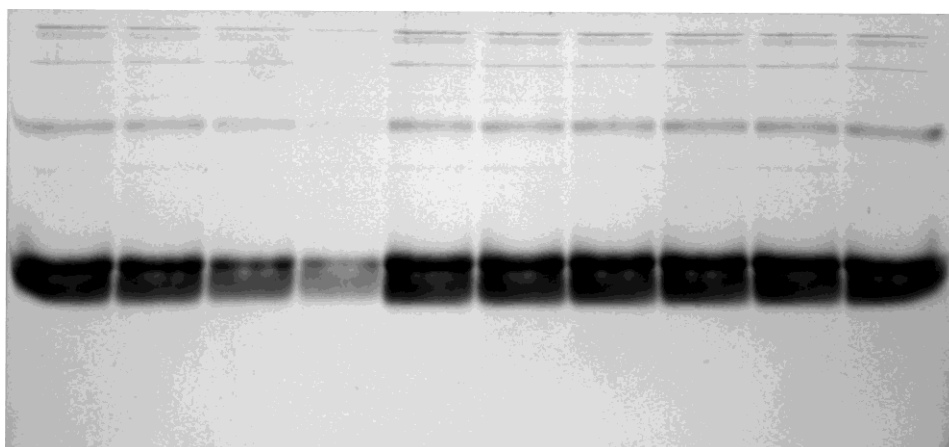

$\alpha$ -tubulin (cytosol fraction)

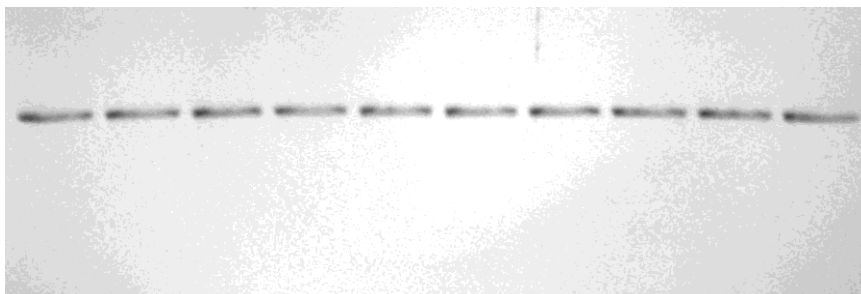

Lamin B (cytosol fraction)

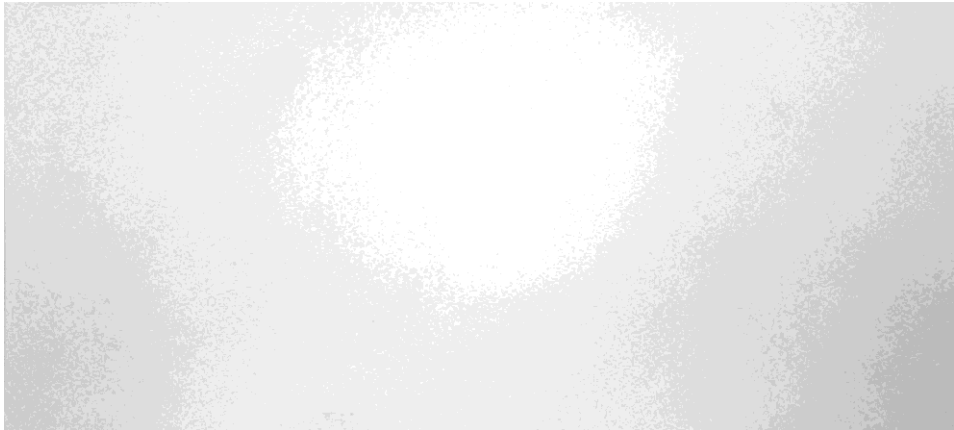

Nucleus Cdk5

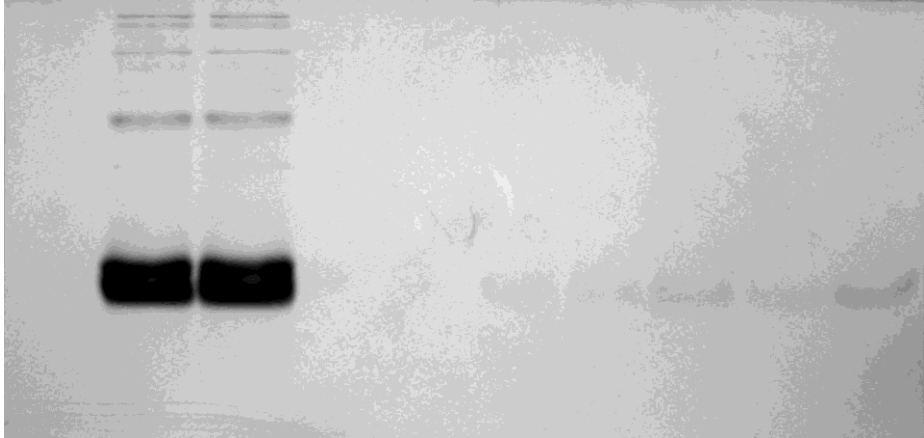

$\alpha$ -tubulin (nucleus fraction)

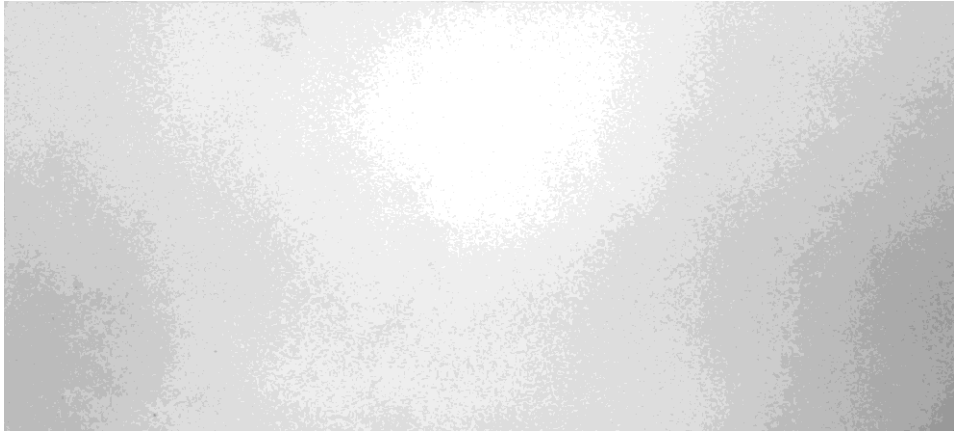

Lamin B (nucleus fraction)

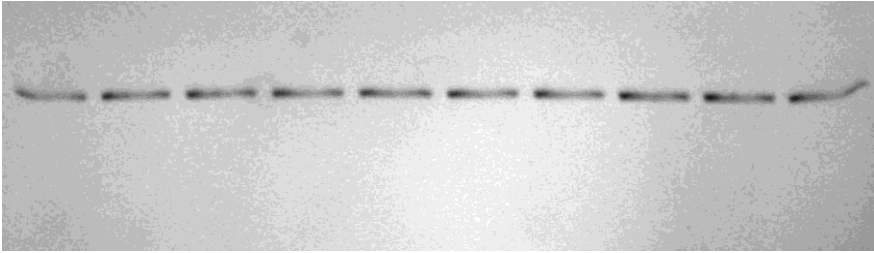

$\beta$ -actin

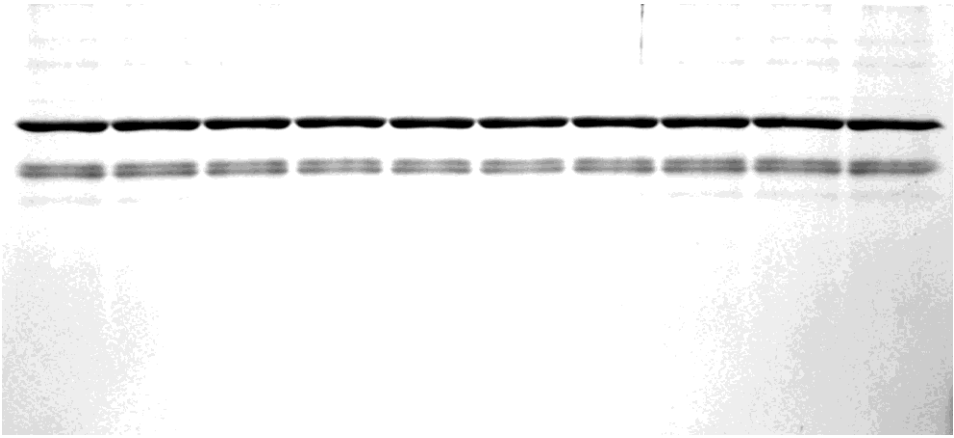

Figure 3. Supplemental data

The uncut images of blot in Figure 3 is shown

p35/p25

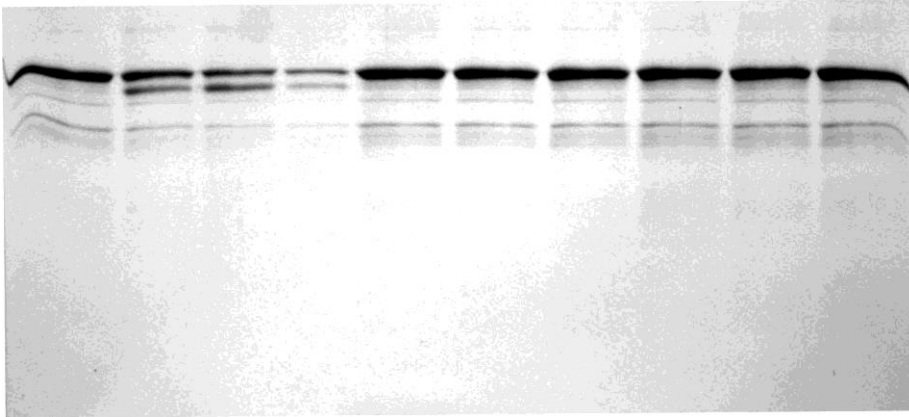

$\beta$ -actin

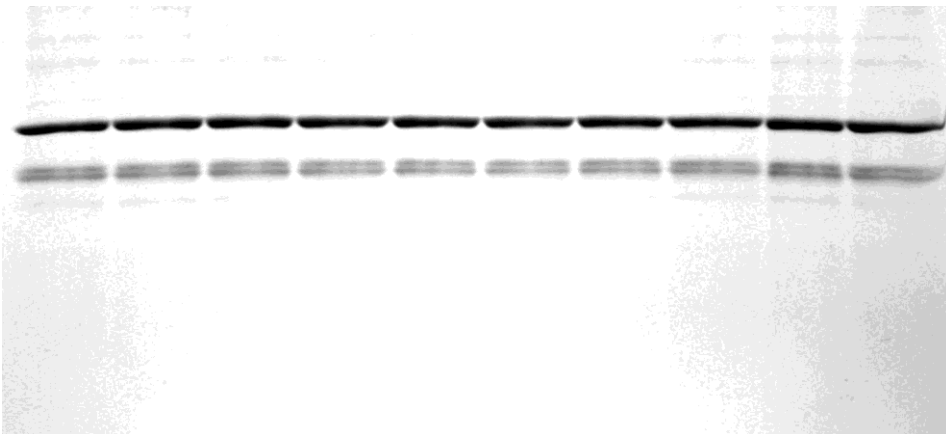

Figure 4A. Supplemental data

The uncut images of blot in Figure 4A is shown

Rb

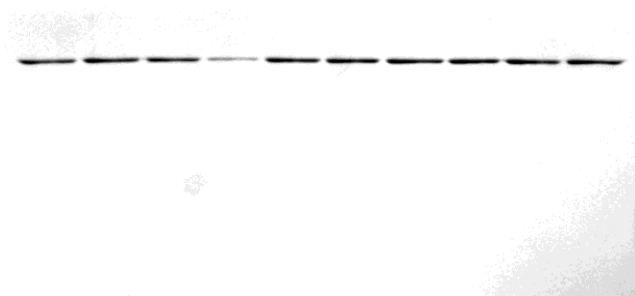

p-Rb

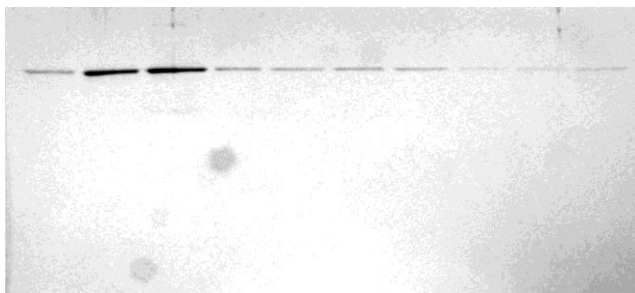

$\beta$ -actin

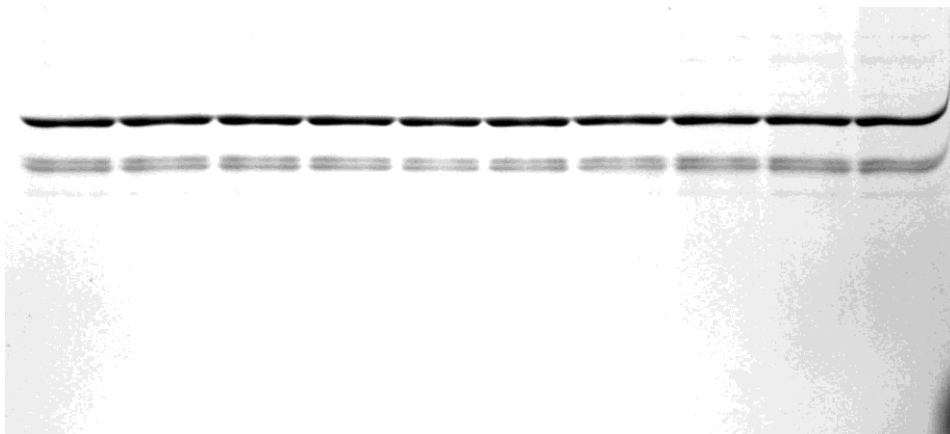

Figure 5A. Supplemental data

The uncut images of blot in Figure 5A is shown

p-53

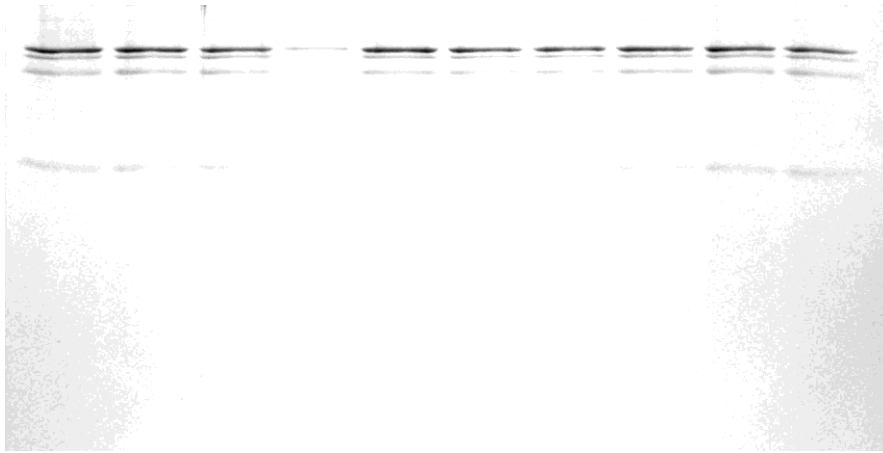

p-p53

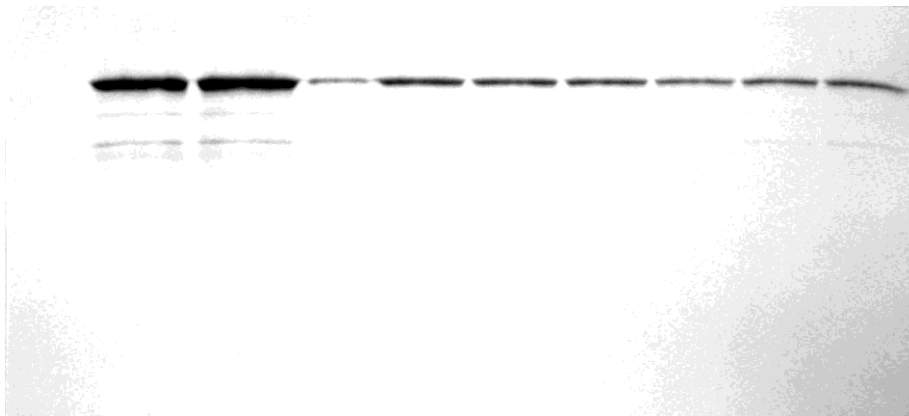

$\beta$ -actin

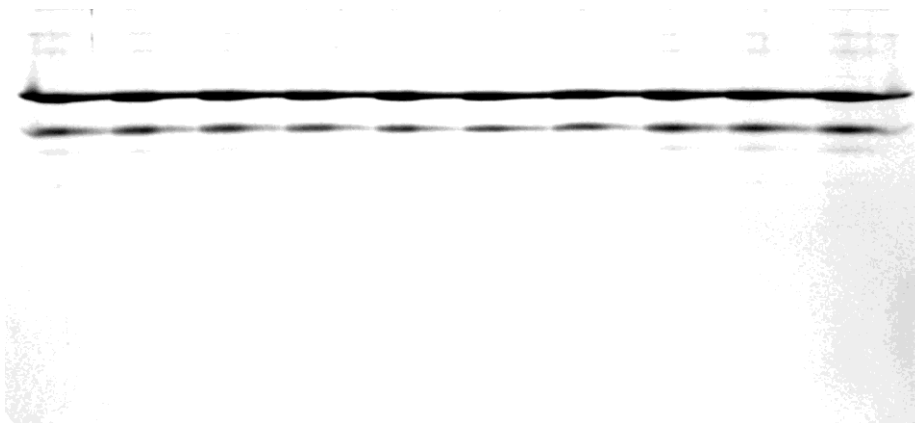

Figure 6. Supplemental data

The uncut images of blot in Figure 6 is shown

Bax

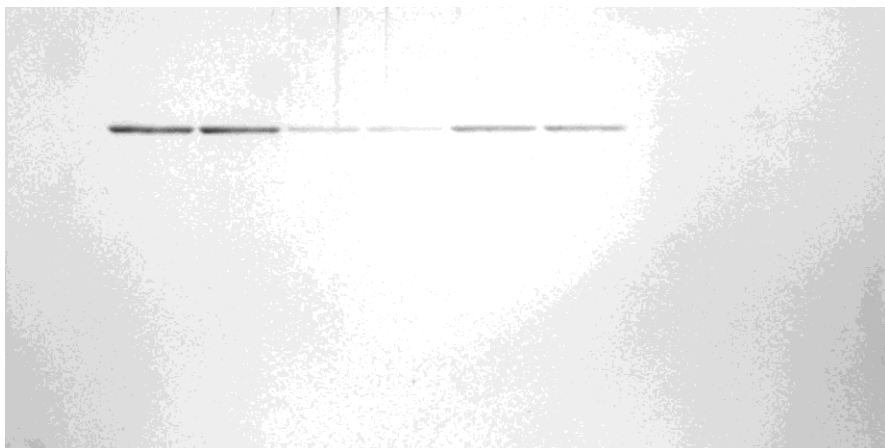

Bcl-2

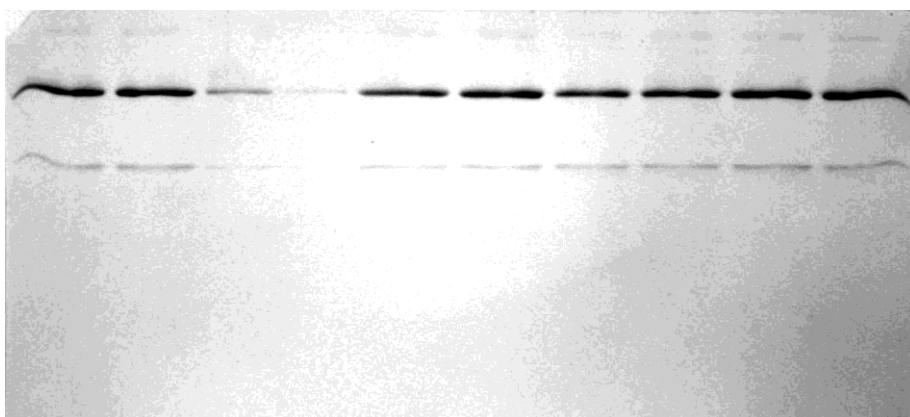

PUMA

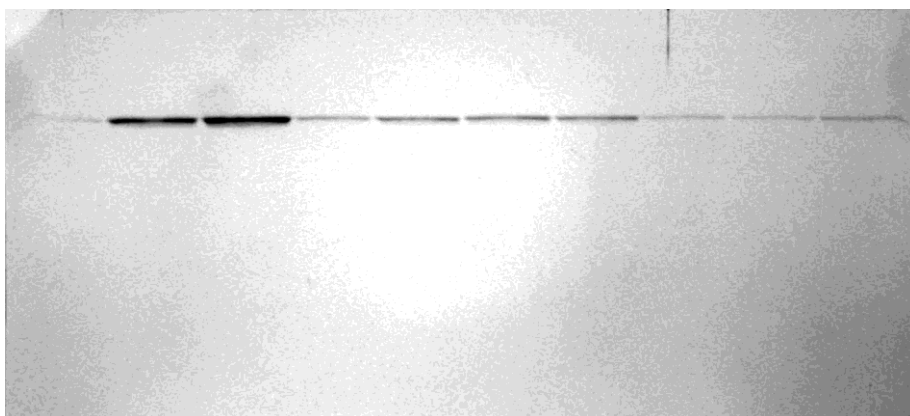



Inactive caspase-3

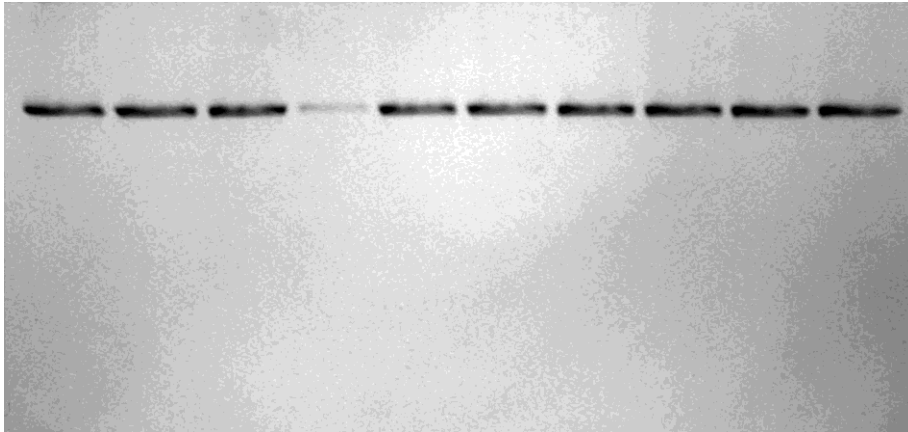

Active caspase-3

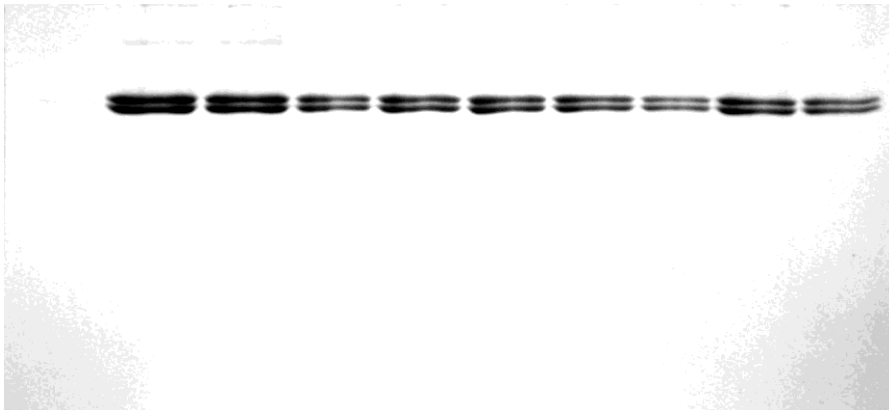

$\beta$ -actin

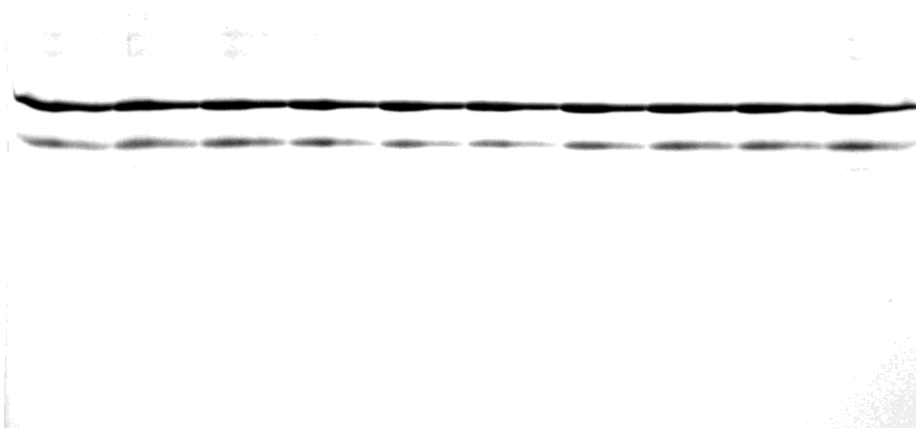

Supplement: 41598_2019_49623_MOESM1_ESM.pdf [file 41598_2019_49623_MOESM1_ESM.pdf]
